# Supplementary material for: Fabrication and analysis of dye-sensitized solar cells (DSSCs) using porphyrin dyes with catechol anchoring groups
Source: Royal Society of Chemistry journal article supplement (doi:10.1039/c5ra23584g), 2016-01-01

**Fabrication and analysis of dye-sensitized solar cells (DSSCs) using porphyrin dyes with catechol anchoring group**

Maryam Adineh<sup>a</sup>, Pooya Tahay<sup>a</sup>, Mohsen Ameri<sup>b</sup>, , Nasser Safari<sup>a\*</sup>, Ezeddin Mohajerani<sup>c</sup>

*a Department of Chemistry, Shahid Beheshti University, Evin, 1983963113 Tehran, Iran*

*b Department of Physics, Bu- Ali Sina University, Hamedan, Iran*

*c Laser and Plasma Research Institute, Shahid Beheshti University, Tehran,*

*1983969411, Iran*

E-mail: n-safari@sbu.ac.ir

# <sup>1</sup>H NMR of tetrakis dihydroxyphenyl porphyrins

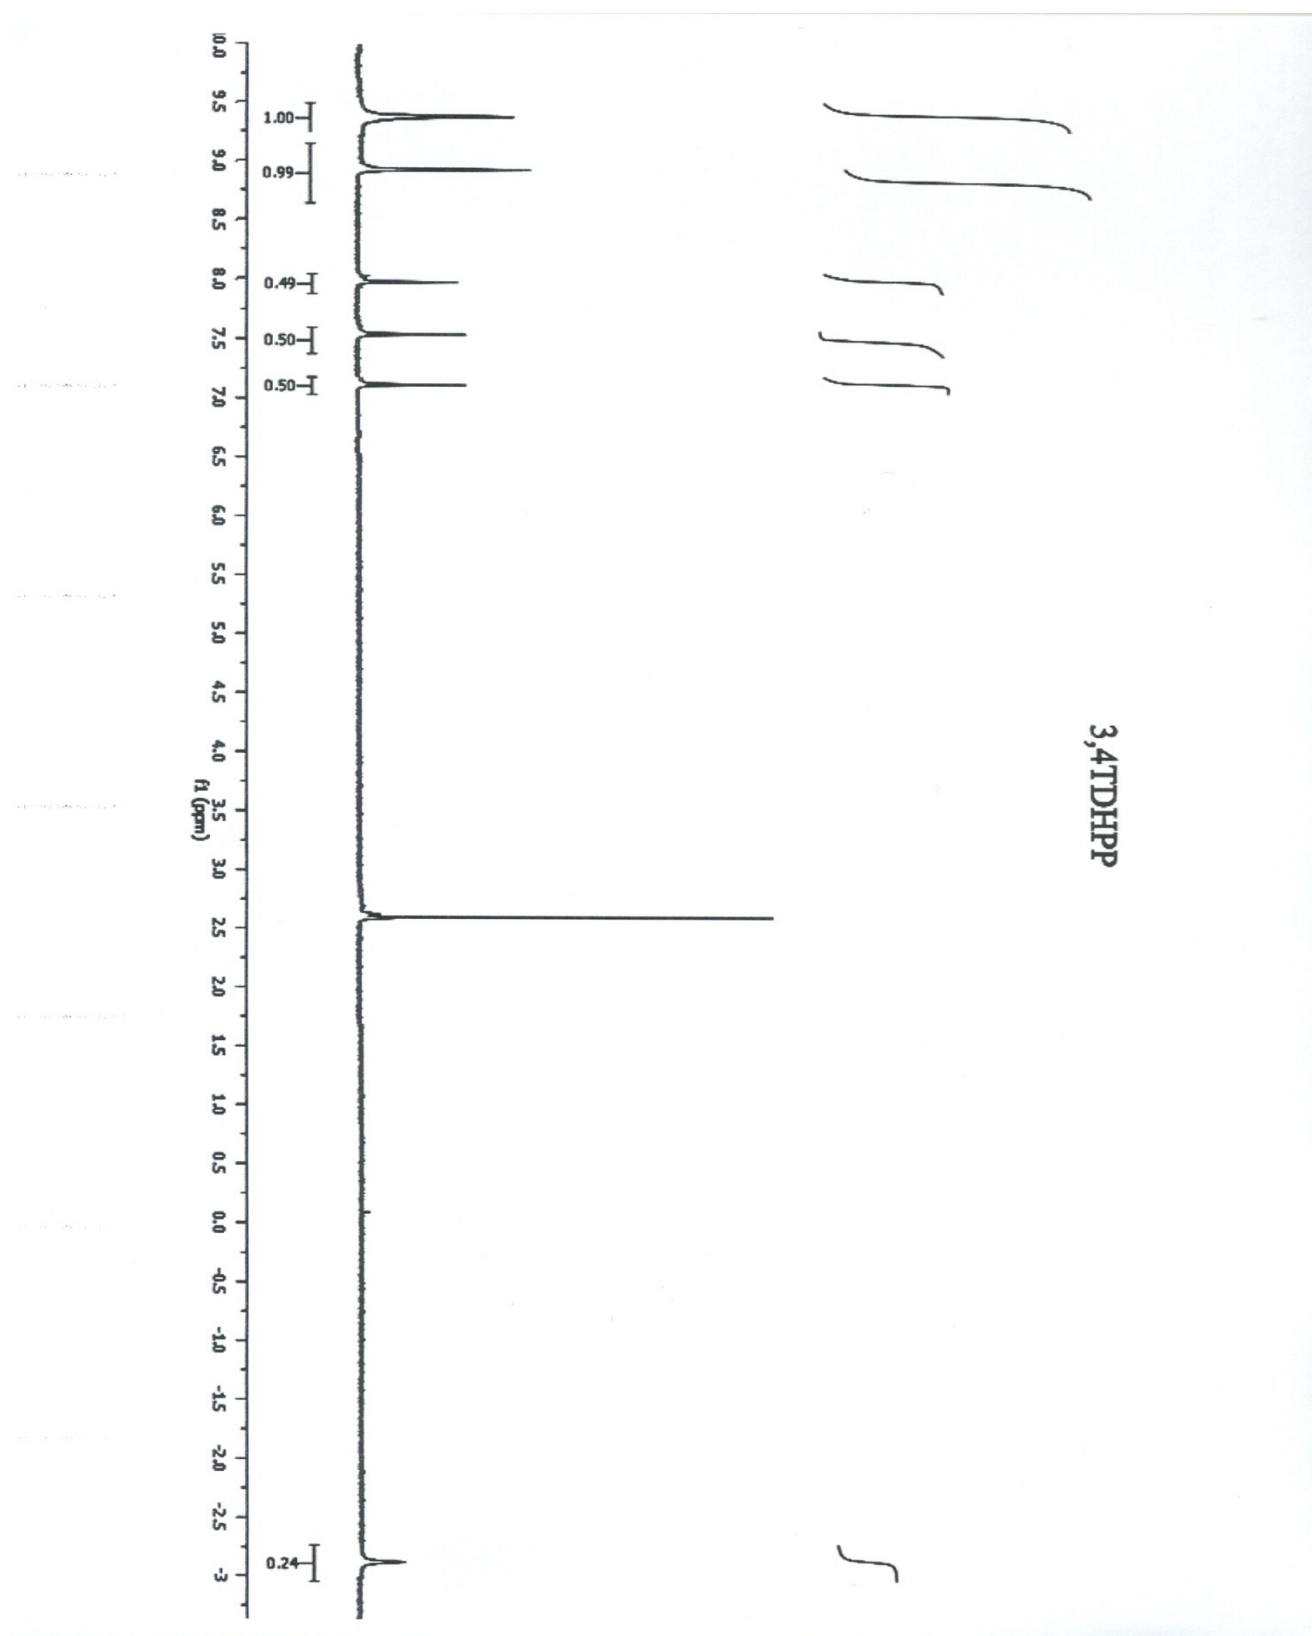

2,3 TDHPP  
1H NMR

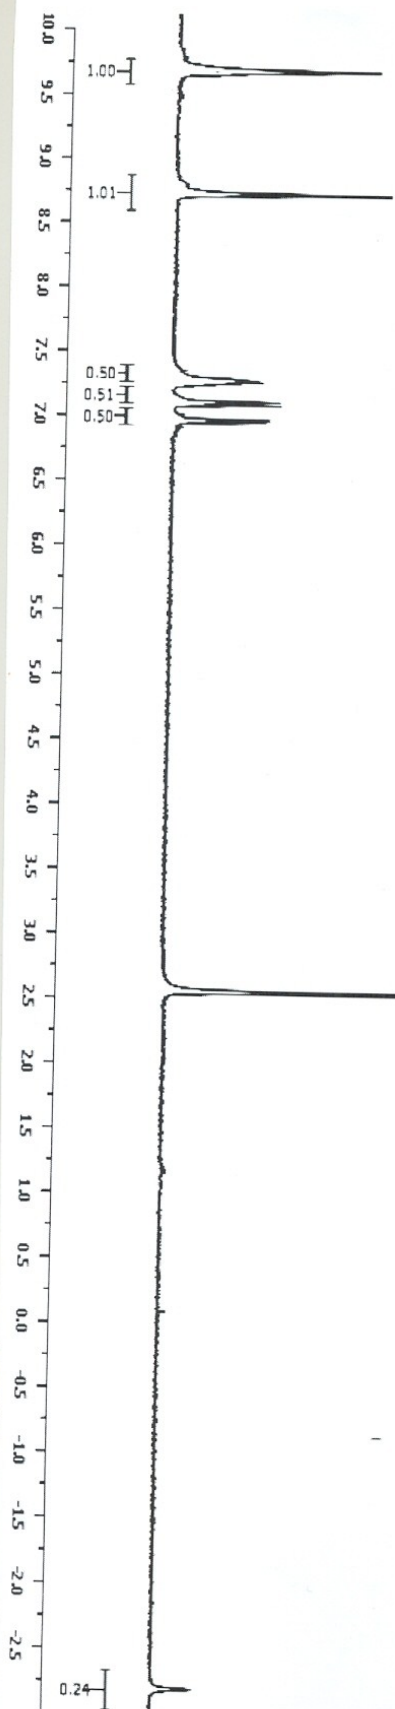

2,4TDHPP  
1H NMR

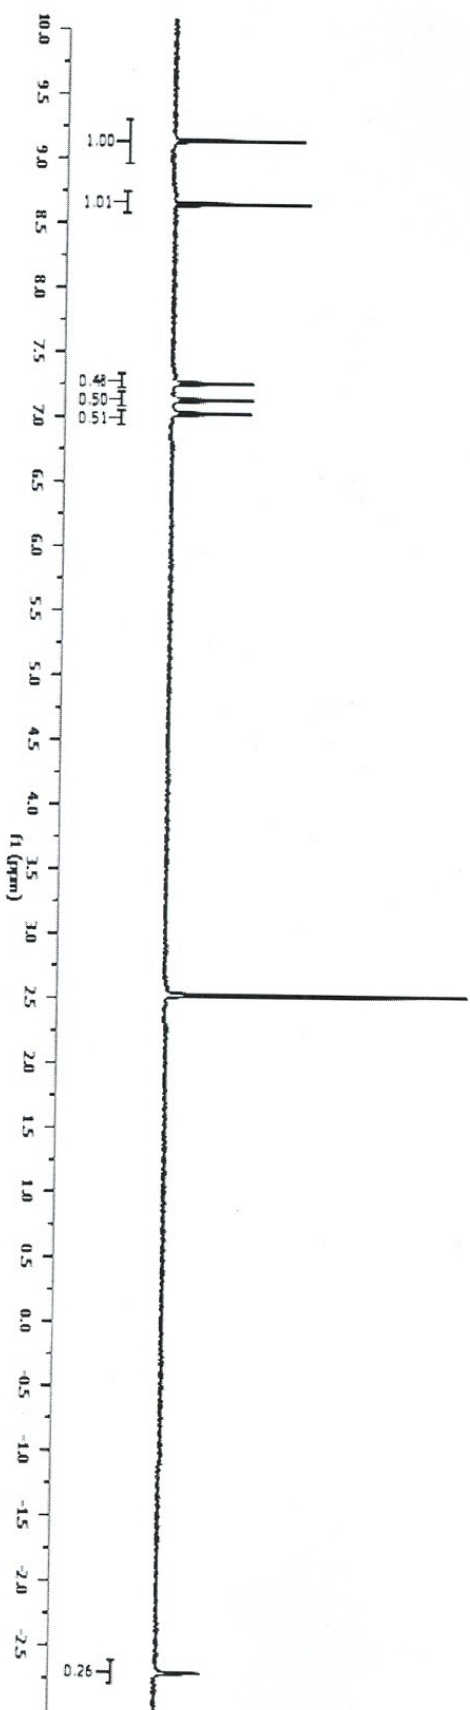

$\text{Zn}_2, 3$  TDHPP  
 $^1\text{H}$  NMR

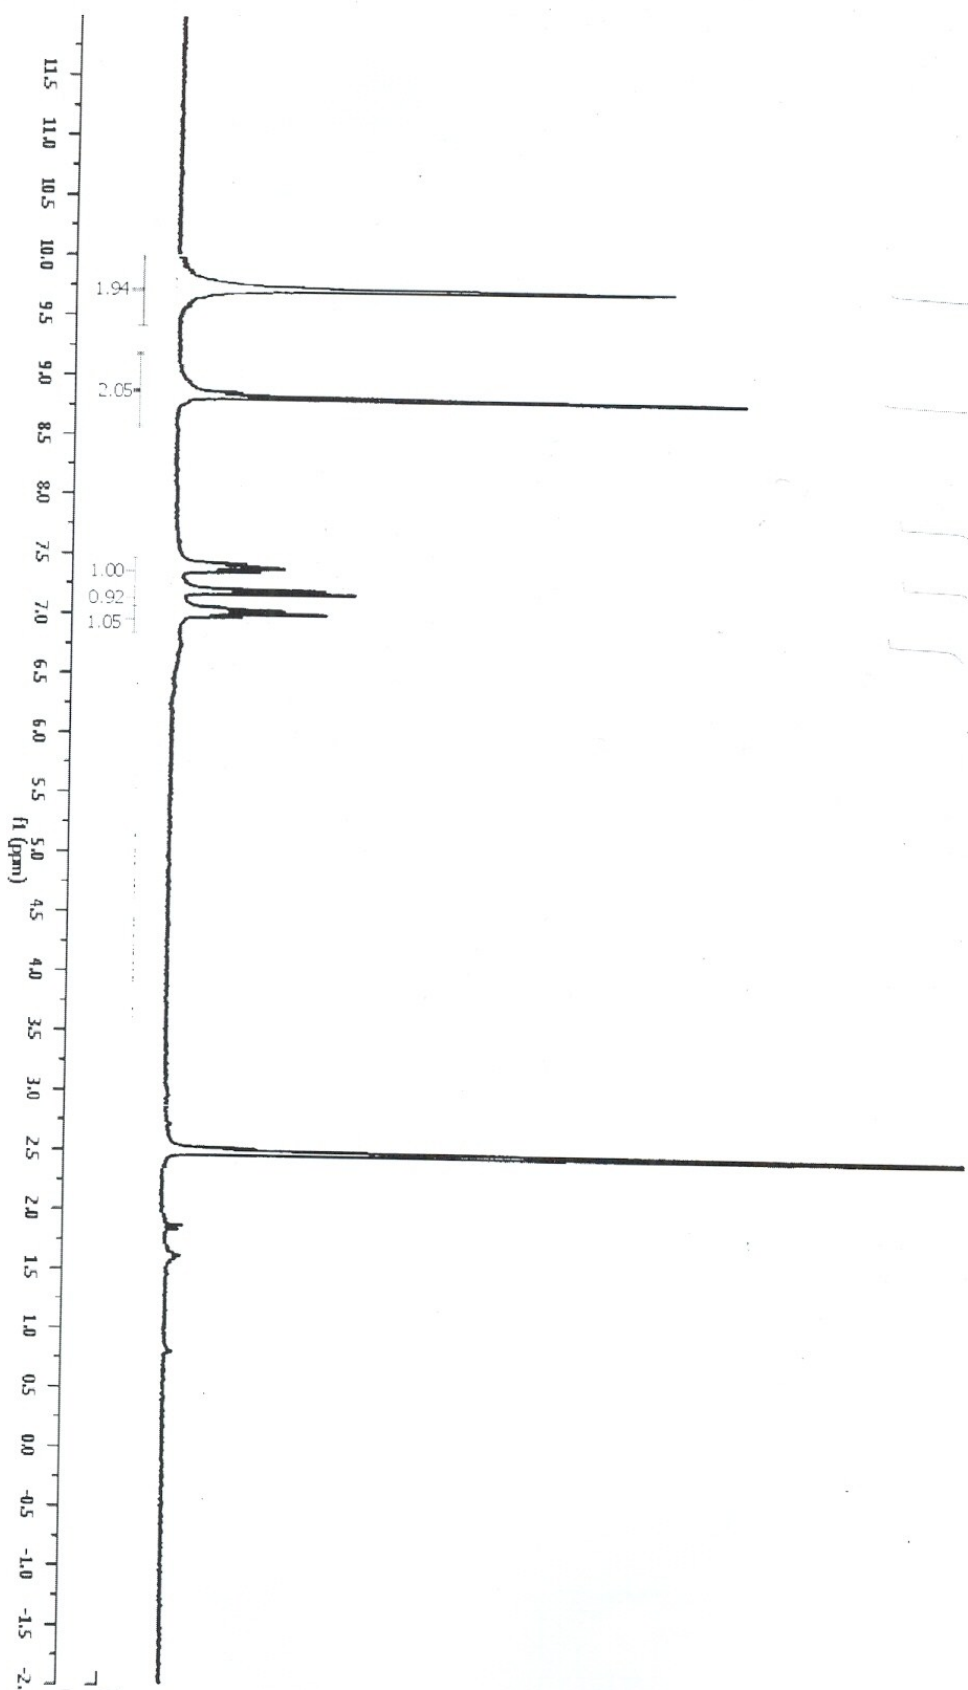

Zn<sub>2</sub>,4TDHPF  
1H NMR

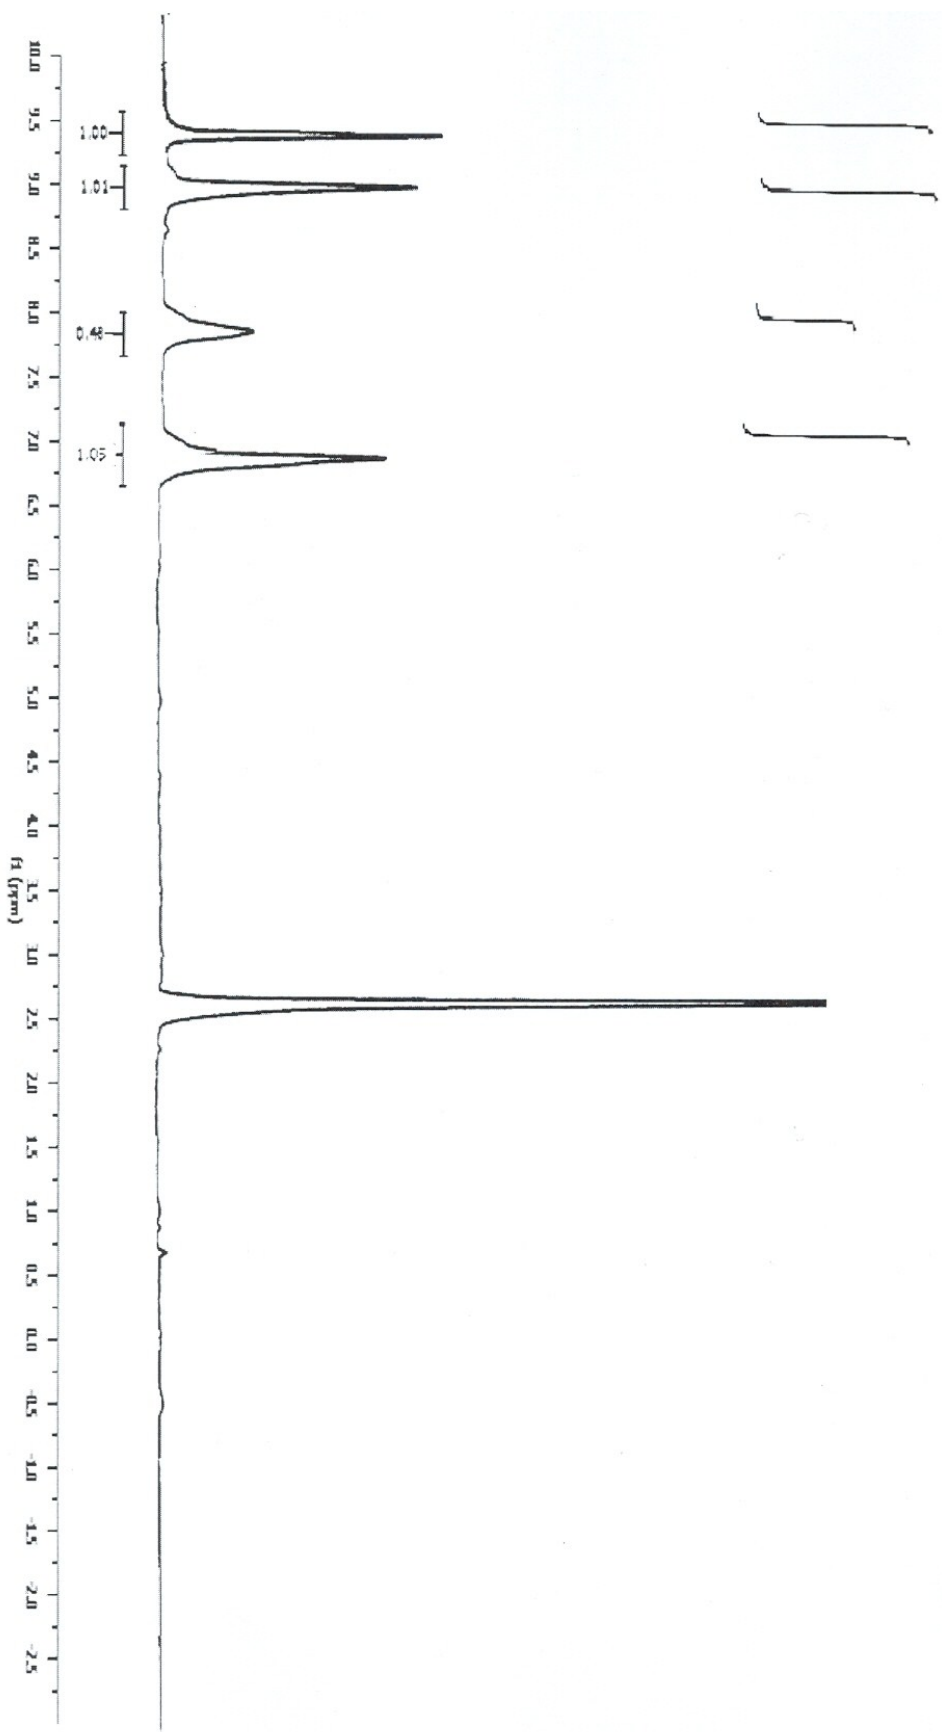

Zn<sub>3</sub>,4-TDHP  
1H NMR

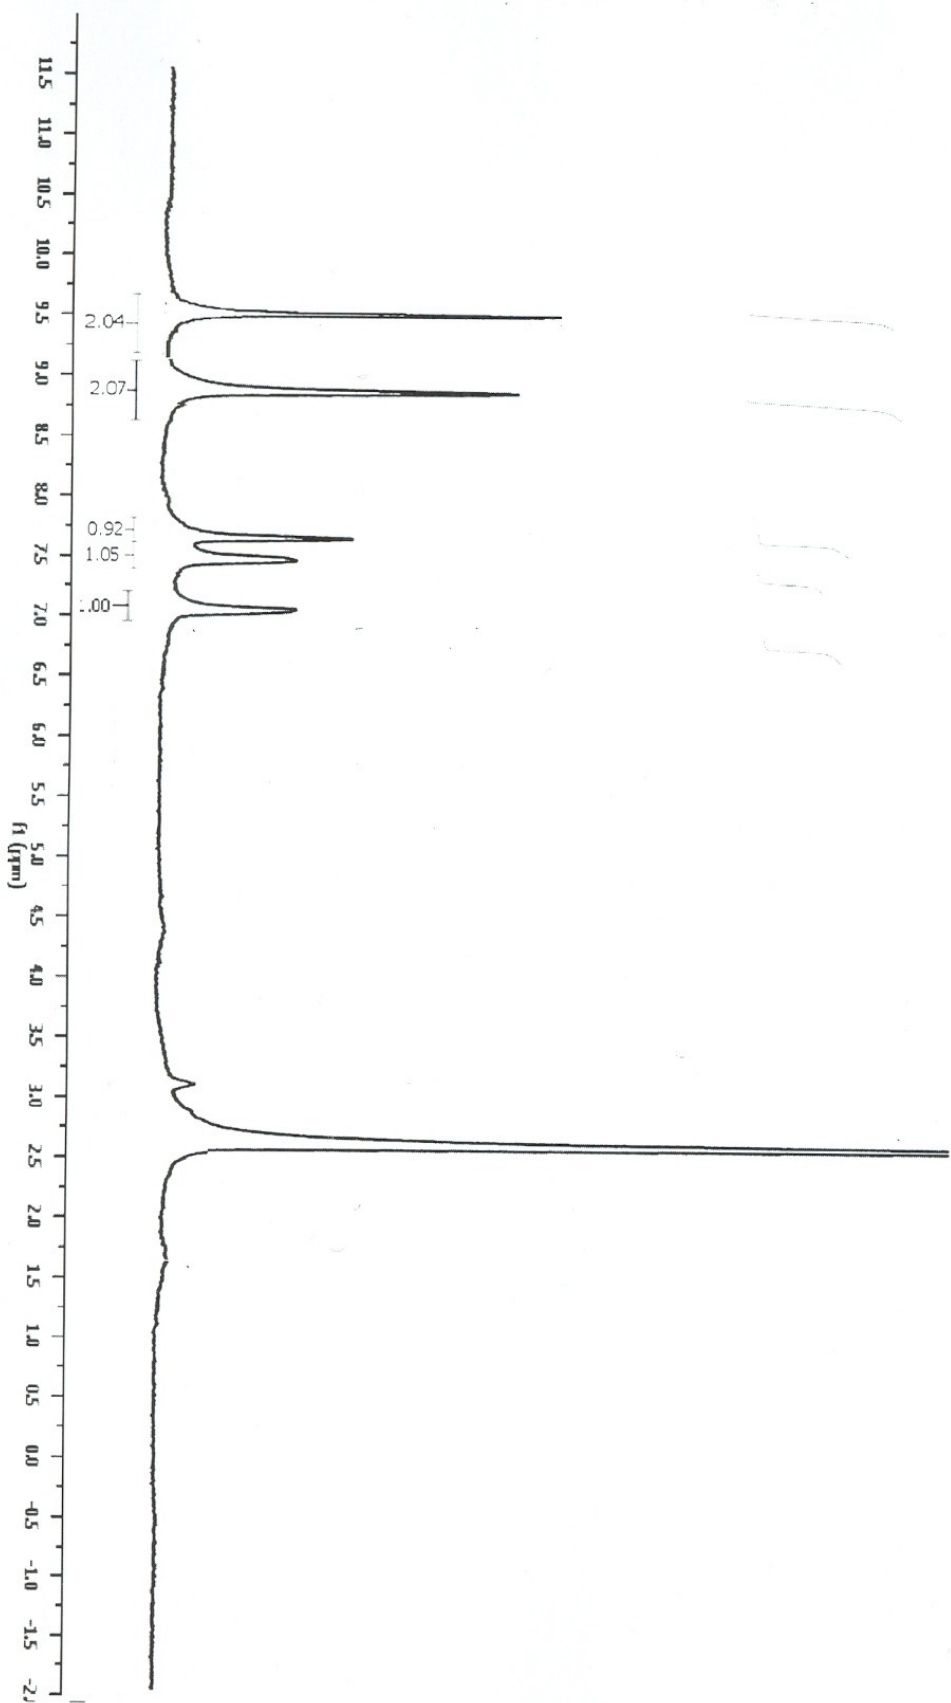

Zn2,5TDHP  
1H NMR

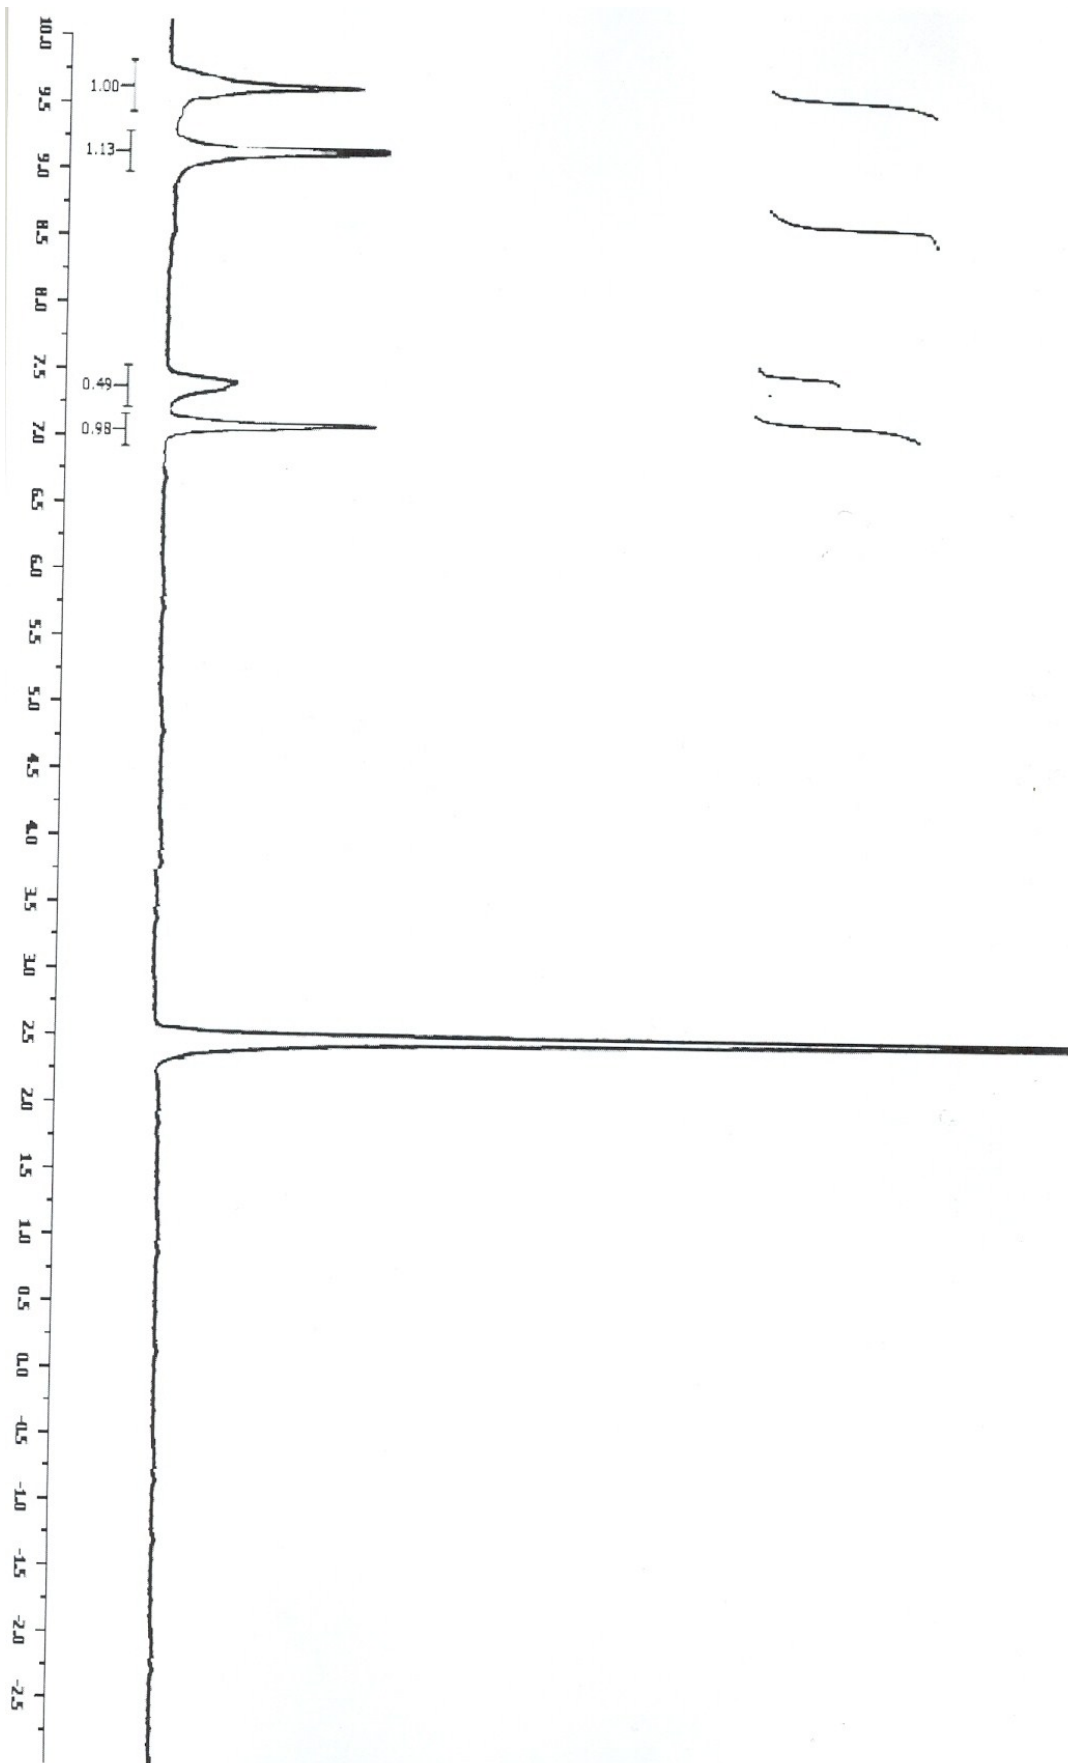



ZnTCPP  
1H NMR

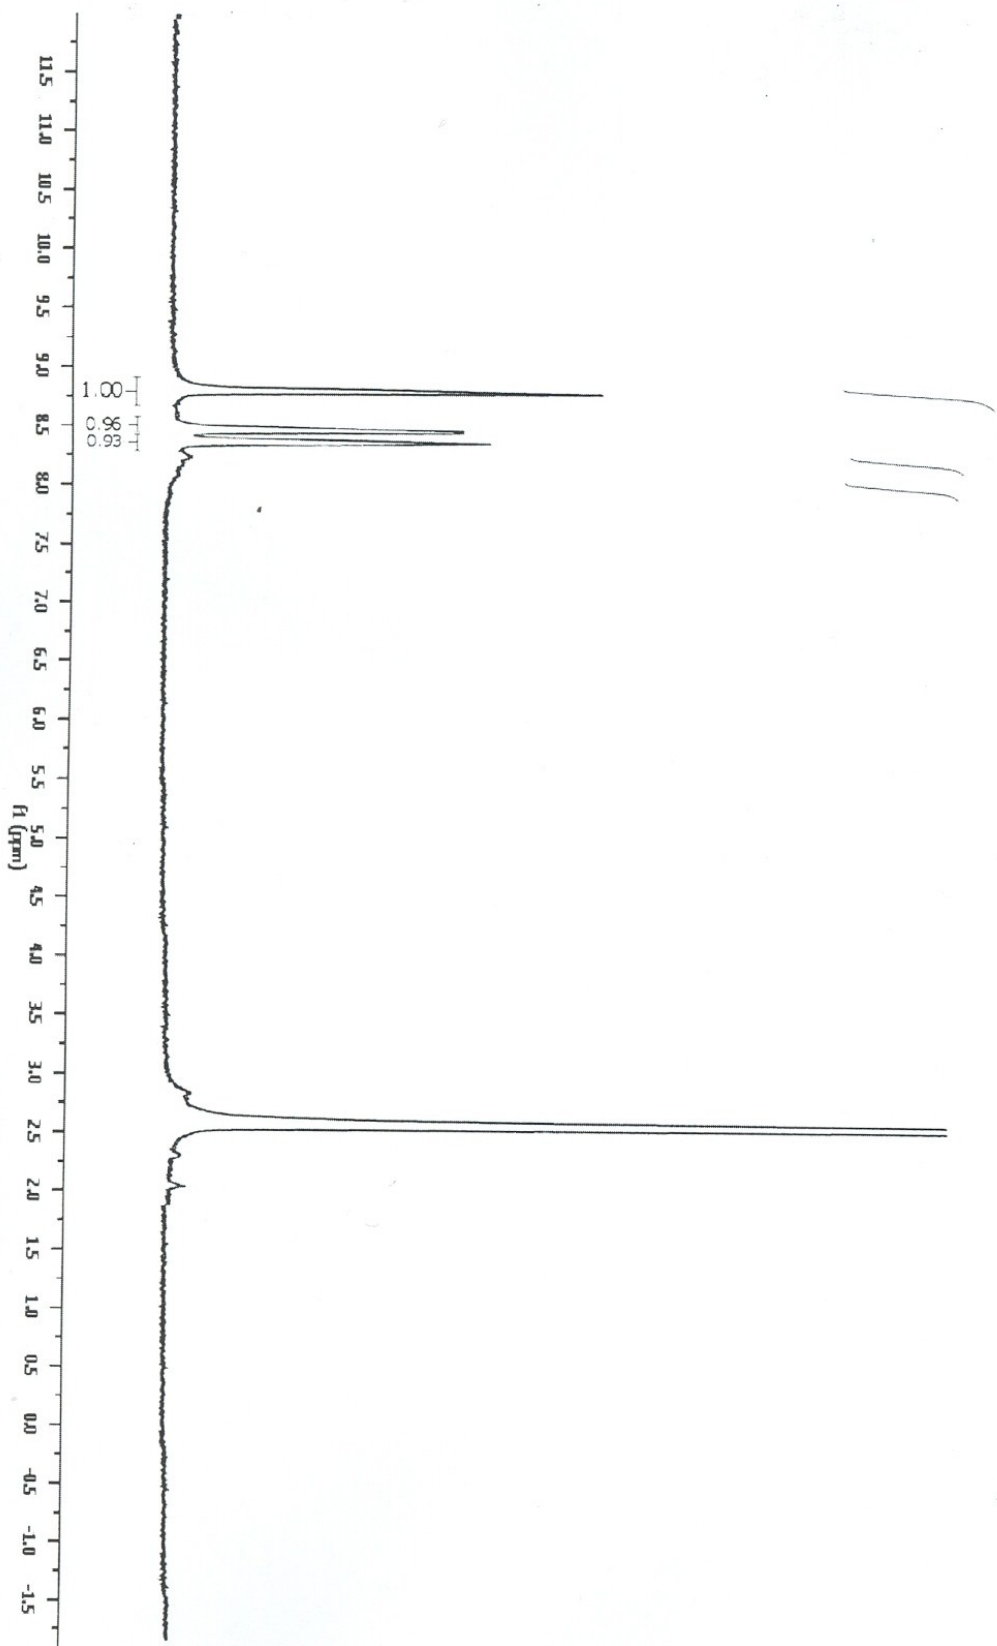

$^{13}\text{C}\{^1\text{H}\}$  NMR of  $\text{Zn}_2,3\text{TDHPP}$

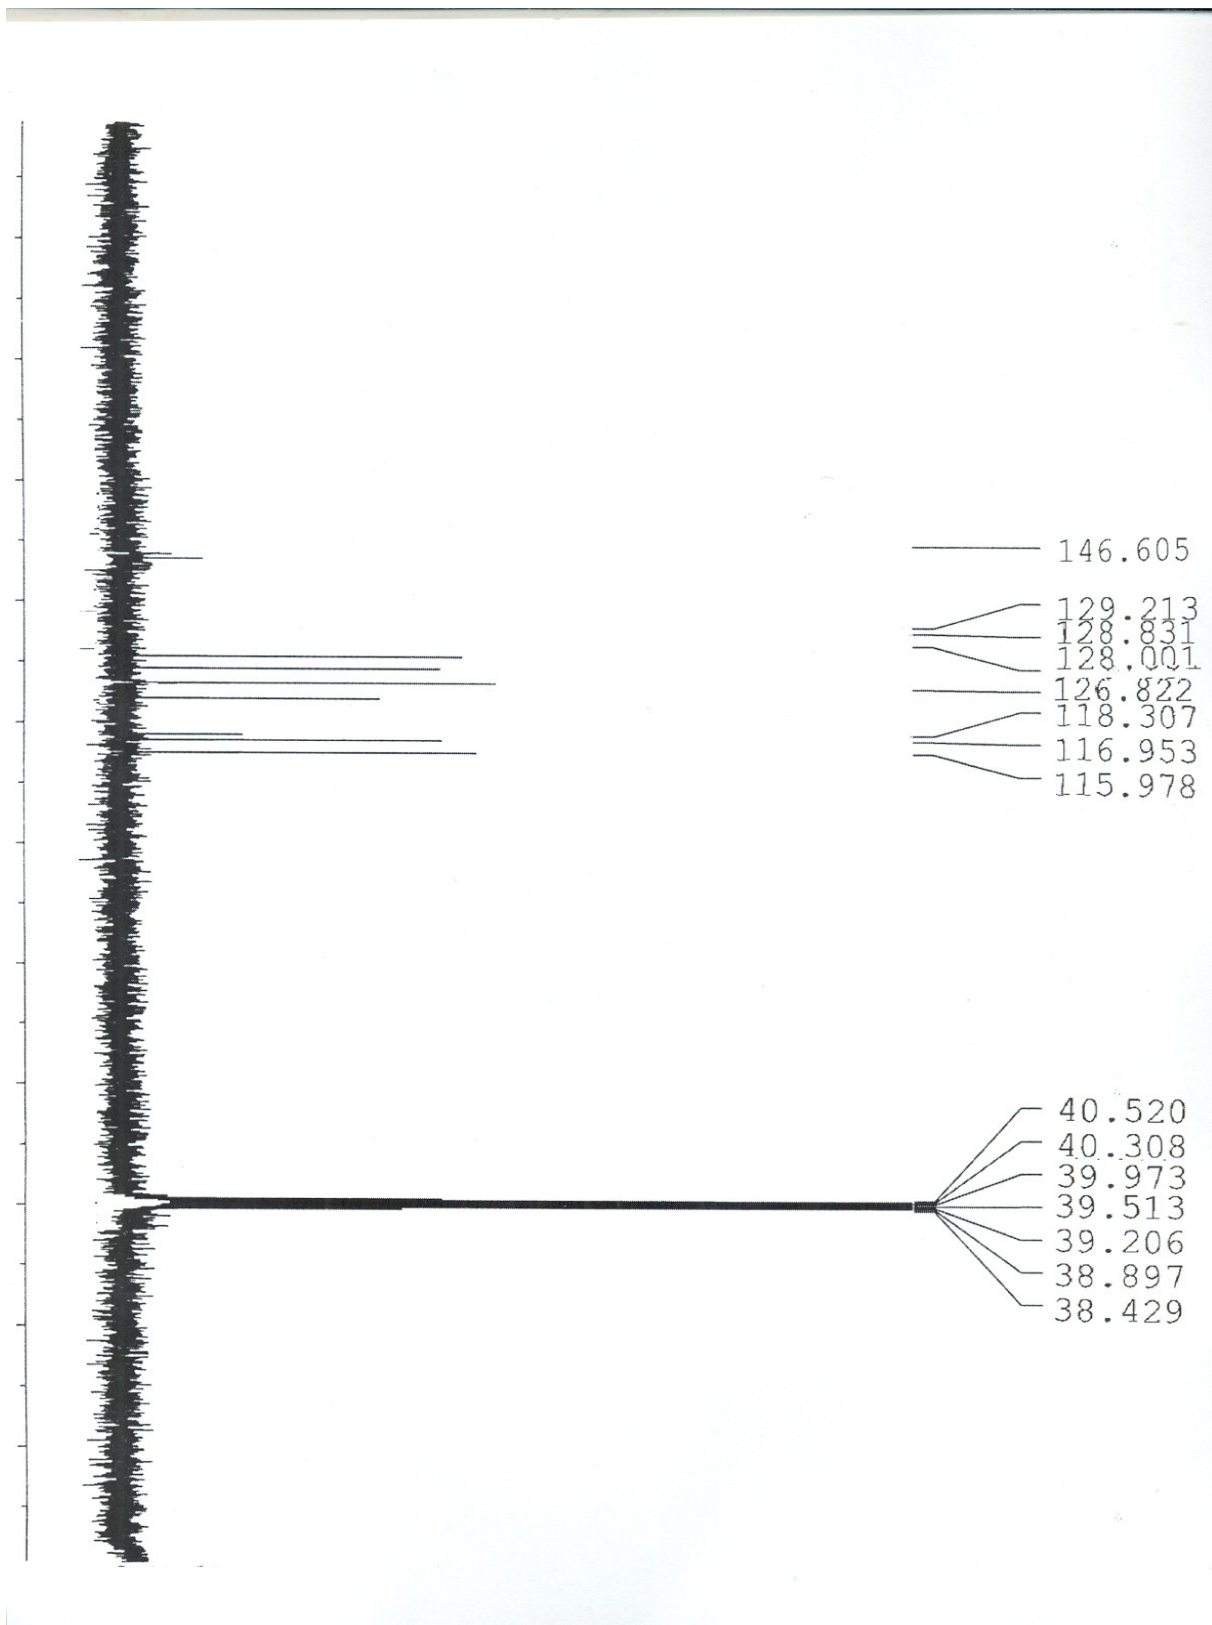

$^{13}\text{C}\{^1\text{H}\}$  NMR of  $\text{Zn}_3,4\text{TDHPP}$

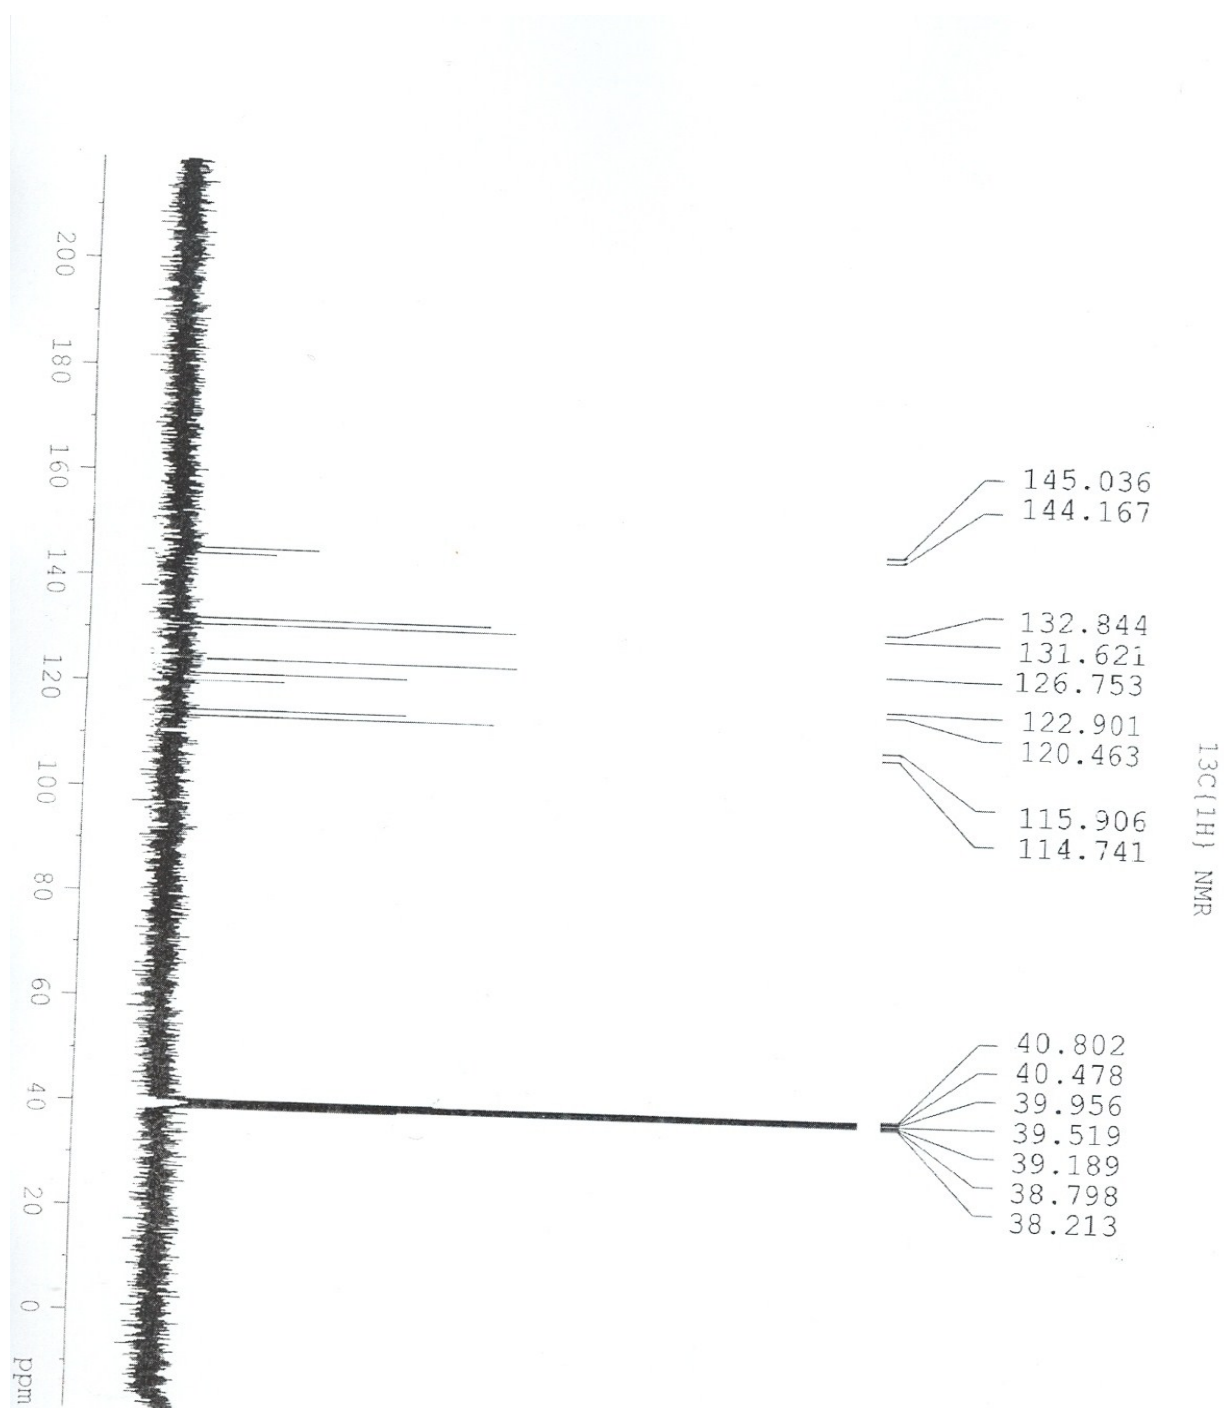

Supplement: c5ra23584g1.pdf [file c5ra23584g1.pdf]
